# Supplementary material for: New Derivatives of 1-(3-Methyl-1-Benzofuran-2-yl)Ethan-1-one: Synthesis and Preliminary Studies of Biological Activity
Source: MDPI journal article supplement (doi:10.3390/ijms25041999), 2024-02-07

*Supplementary Material*

**New Derivatives of 1-(3-Methyl-1-Benzofuran-2-yl)Ethan-1-one: Synthesis and Preliminary Studies of Biological Activity**

**Mariola Napiórkowska <sup>1,\*</sup>, Pratheeba Kumaravel <sup>1</sup>, Mithulya Amboo Mahentheran <sup>1</sup>, Ewelina Kiernozek-Kalińska <sup>2</sup> and Emilia Grosicka-Maciąg <sup>3</sup>**

1 Chair and Department of Biochemistry, Medical University of Warsaw, 1 Banacha Str., 02-097 Warsaw, Poland;

s079330@student.wum.edu.pl (P.K.); mithulya.amboo.5@gmail.com (M.A.M.)

2 Department of Immunology, Faculty of Biology, University of Warsaw, 1 Miecznikowa Str., 02-096 Warsaw, Poland;

e.kiernozek@uw.edu.pl

3 Department of Biochemistry and Laboratory Diagnostic, Collegium Medicum Cardinal Stefan Wyszyński University, Kazimierza Wóycickiego 1 Str.,

01-938 Warsaw, Poland; e.grosicka-maciag@uksw.edu.pl

\* Correspondence: mariola.napiorkowska@wum.edu.pl; Tel.: +48-(22)-572-06-93, Fax: +48-(22)-572-06-79

**Spectrum 1.**  $^1\text{H}$ NMR of compound **1** (300 MHz,  $\text{CDCl}_3$ ).

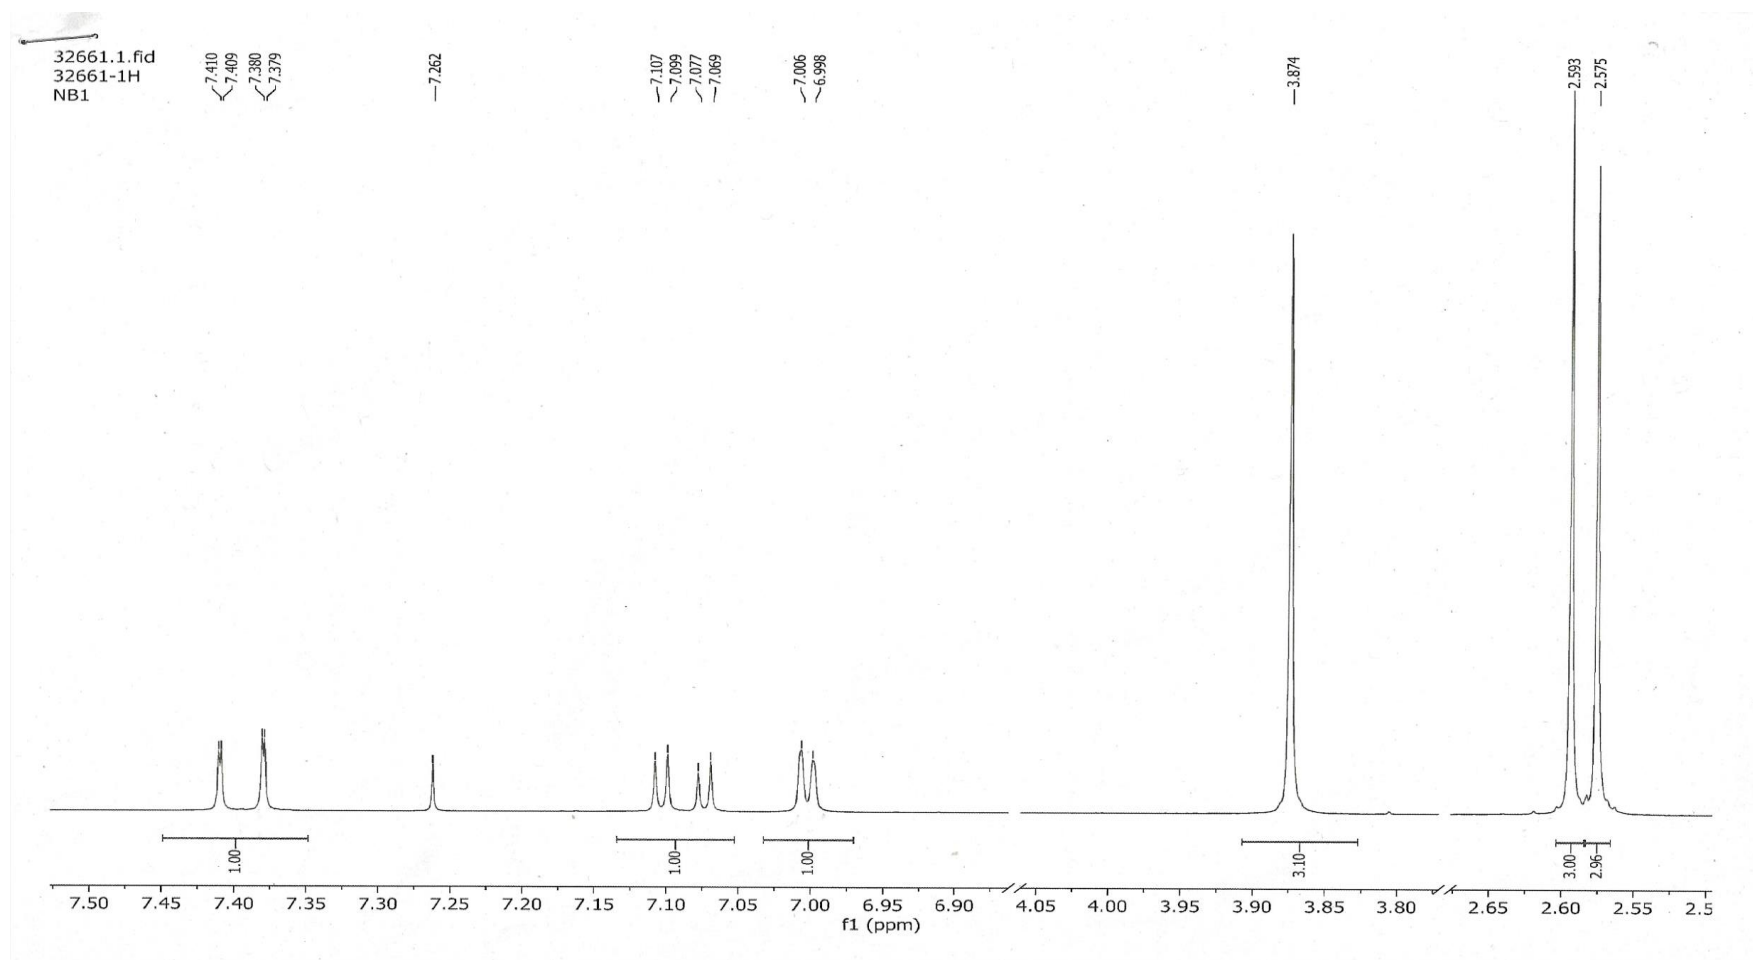

**Spectrum 2.**  $^1\text{H}$ NMR of compound **2** (300 MHz,  $\text{CDCl}_3$ ).

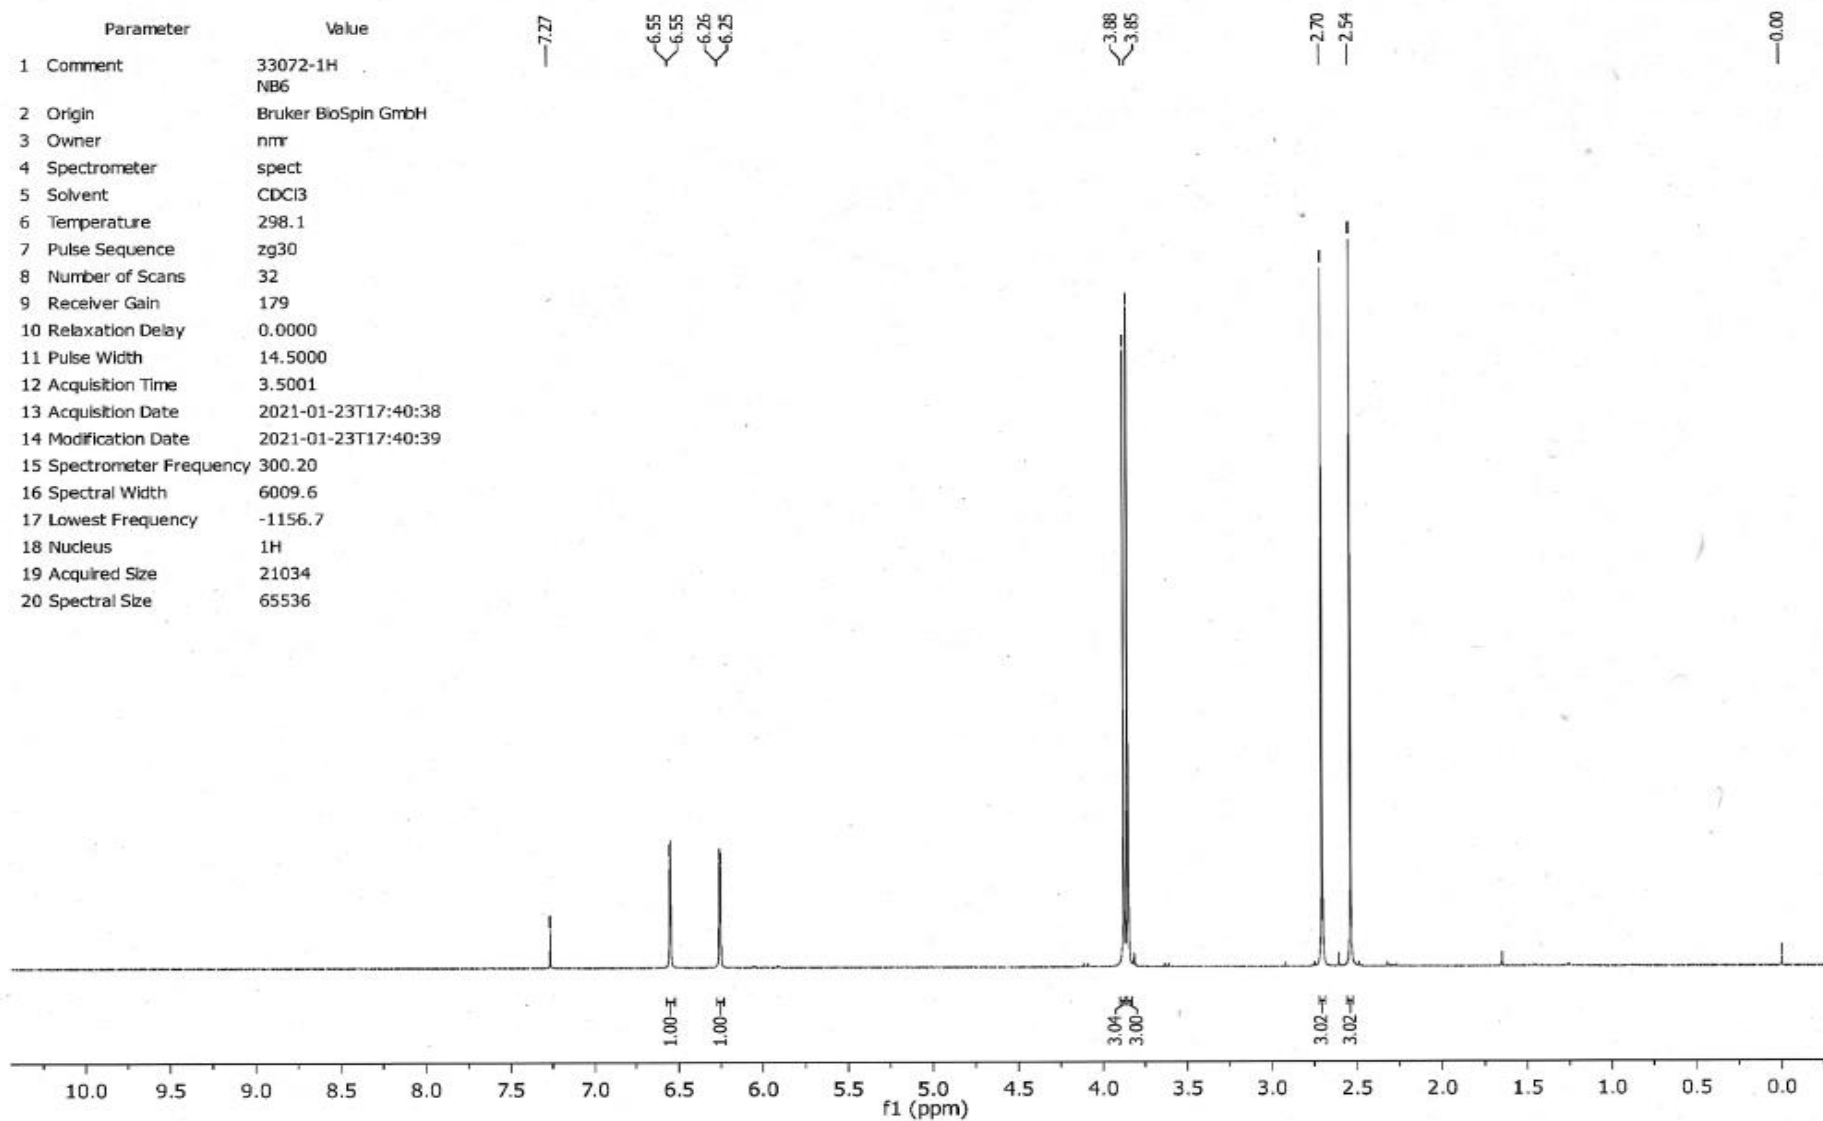

**Spectrum 3.**  $^1\text{H}$ NMR of compound 3 (300 MHz,  $\text{CDCl}_3$ ).

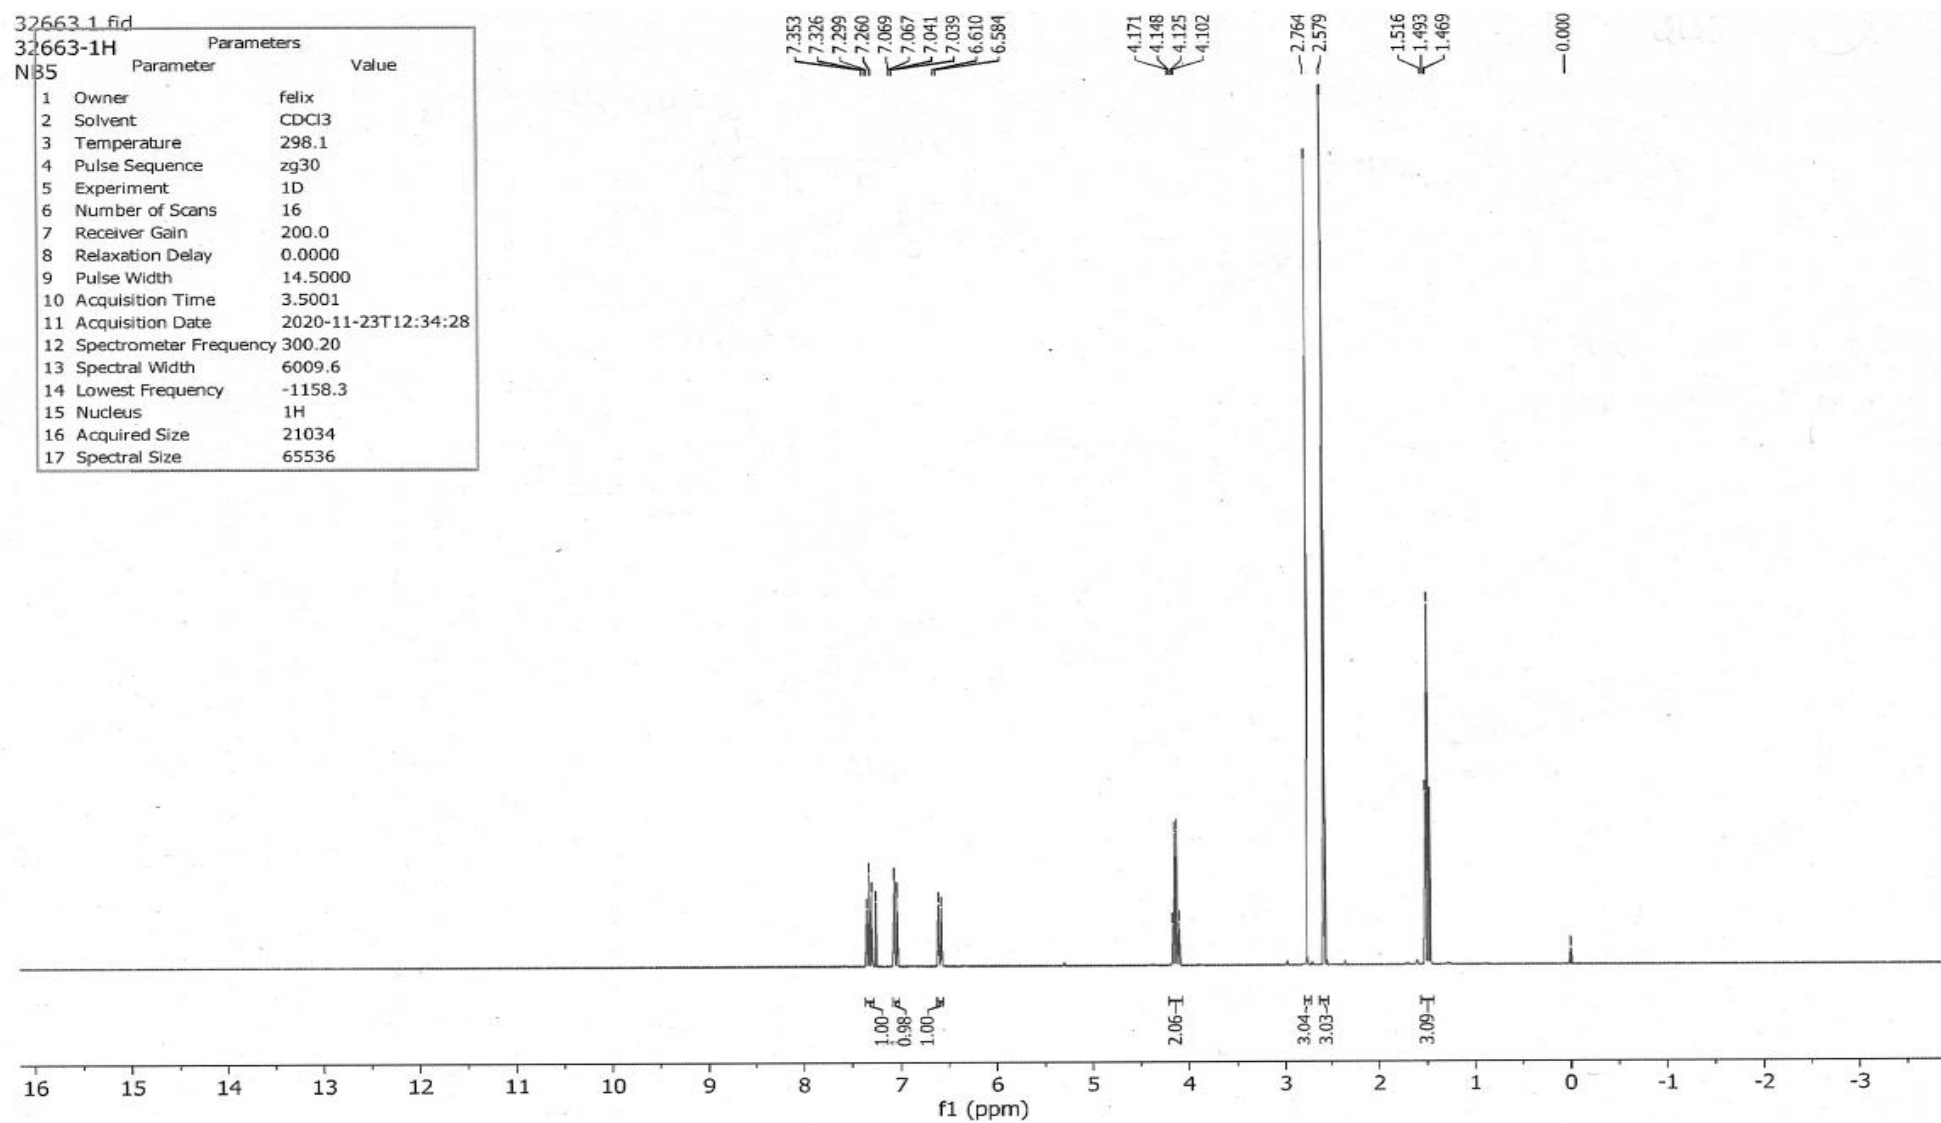

**Spectrum 4.**  $^1\text{H}$ NMR of compound **4** (300 MHz,  $\text{CDCl}_3$ ).

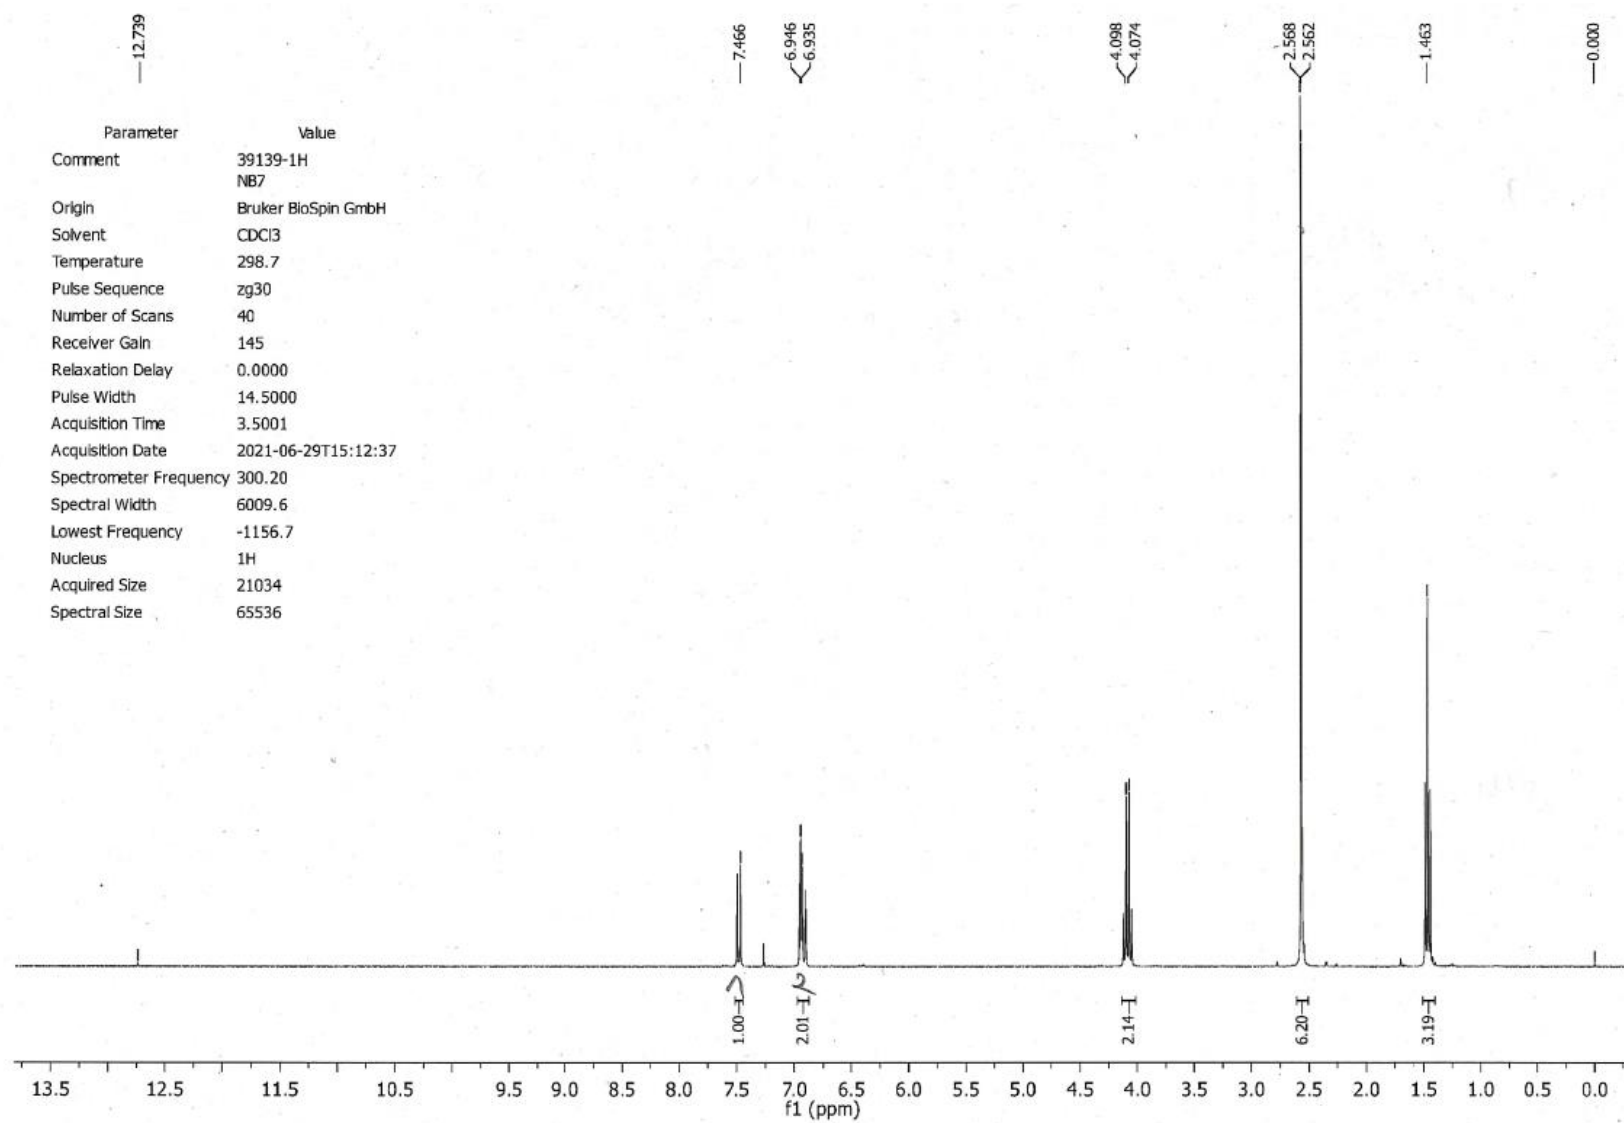

**Spectrum 5.**  $^1\text{H}$ NMR of compound 5 (300 MHz,  $\text{CDCl}_3$ ).

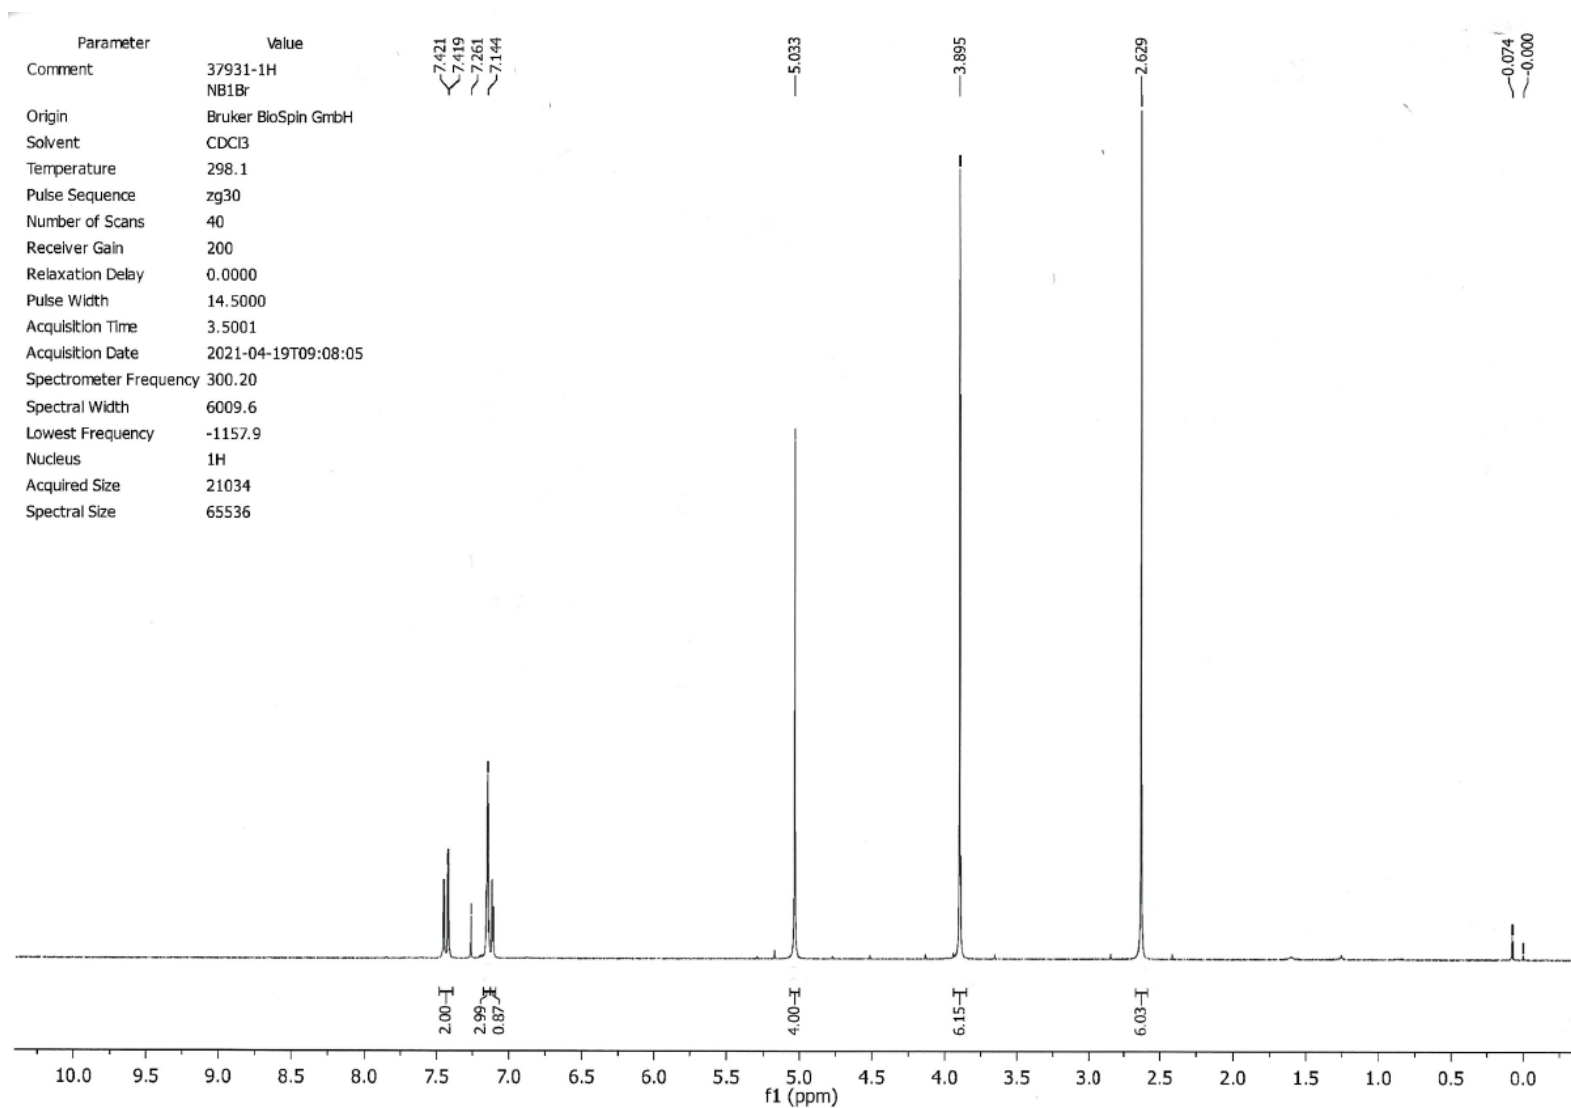

**Spectrum 6.**  $^1\text{H}$ NMR of compound **6** (300 MHz,  $\text{CDCl}_3$ ).

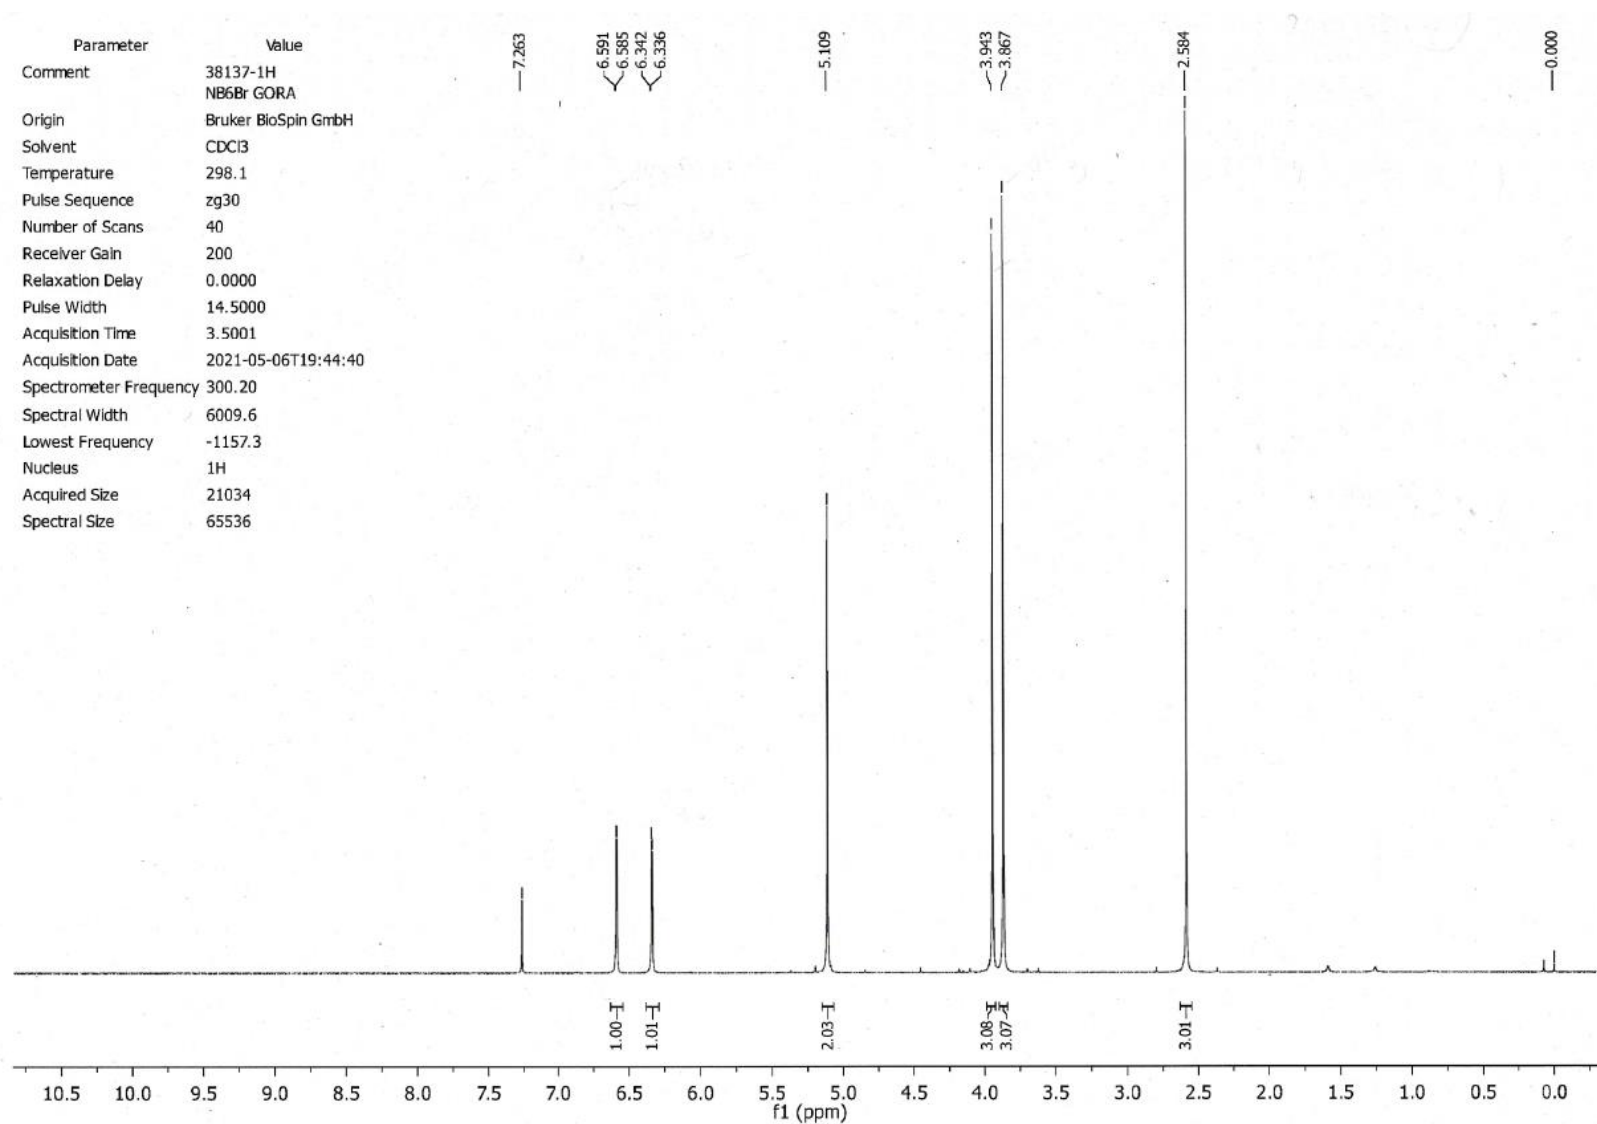

**Spectrum 7.**  $^1\text{H}$ NMR of compound **7** (300 MHz,  $\text{CDCl}_3$ ).

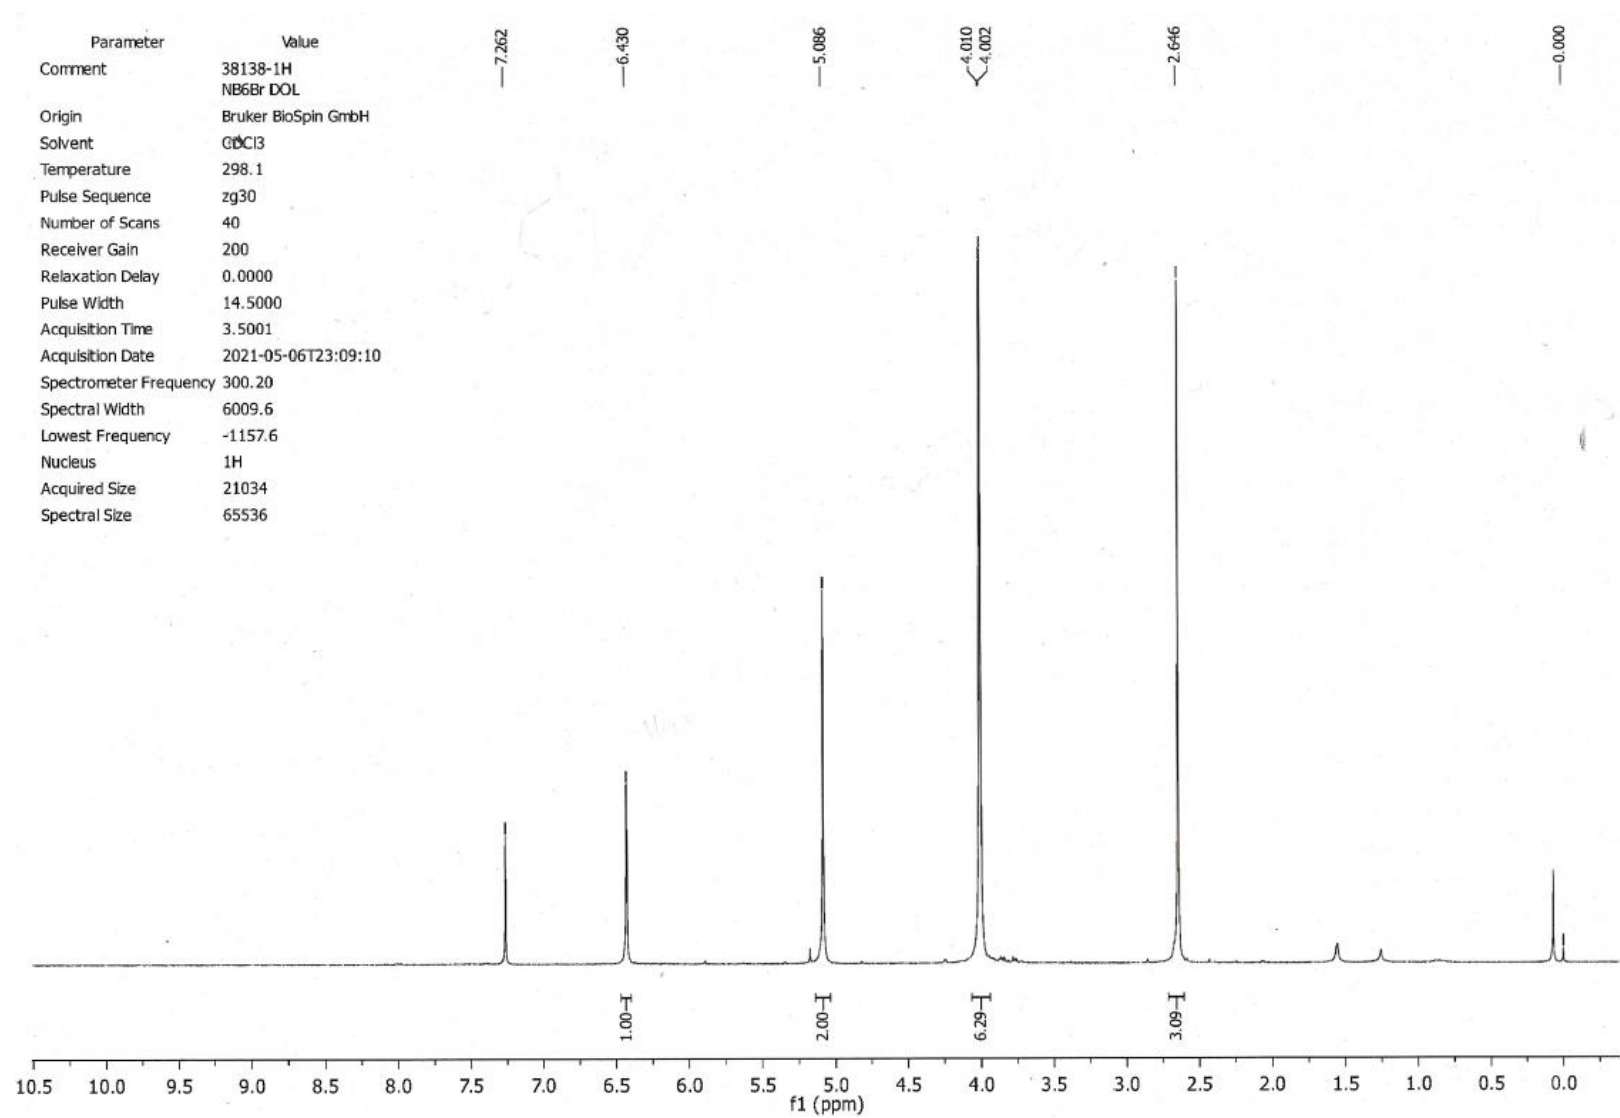



**Spectrum 8.**  $^1\text{H}$ NMR of compound **8** (300 MHz,  $\text{CDCl}_3$ ).

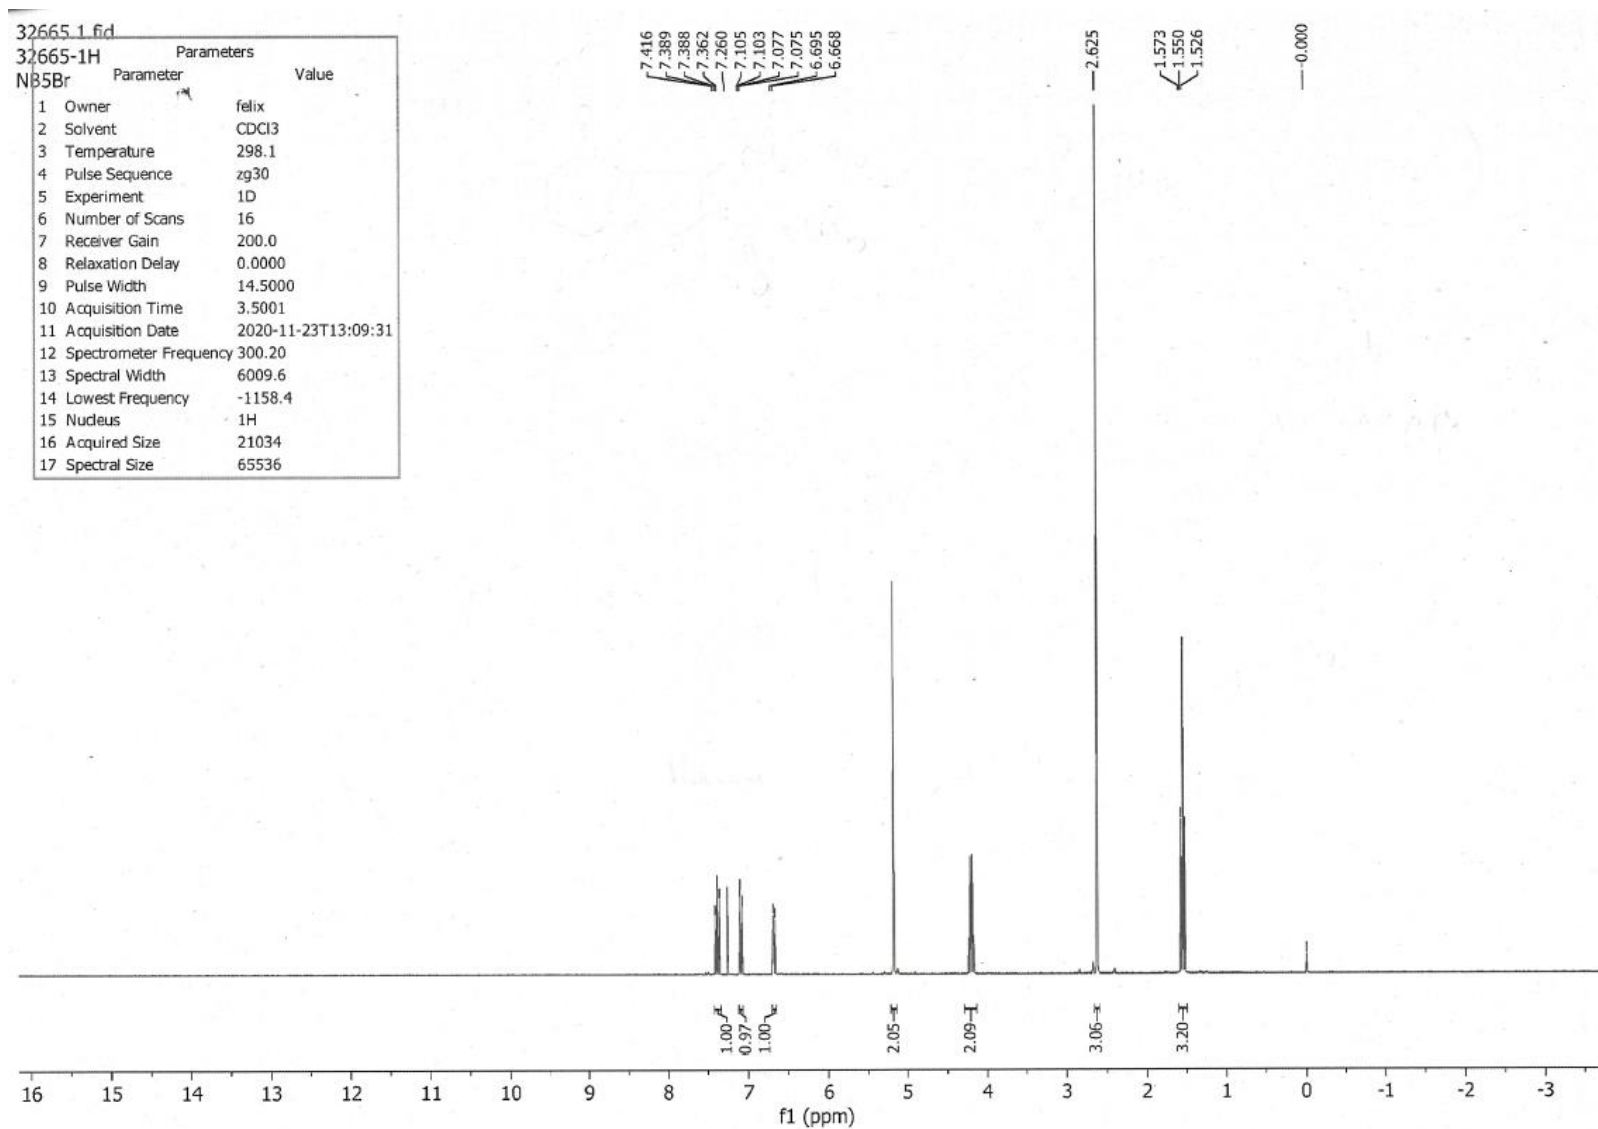

**Spectrum 9.**  $^1\text{H}$ NMR of compound **9** (300 MHz,  $\text{CDCl}_3$ ).

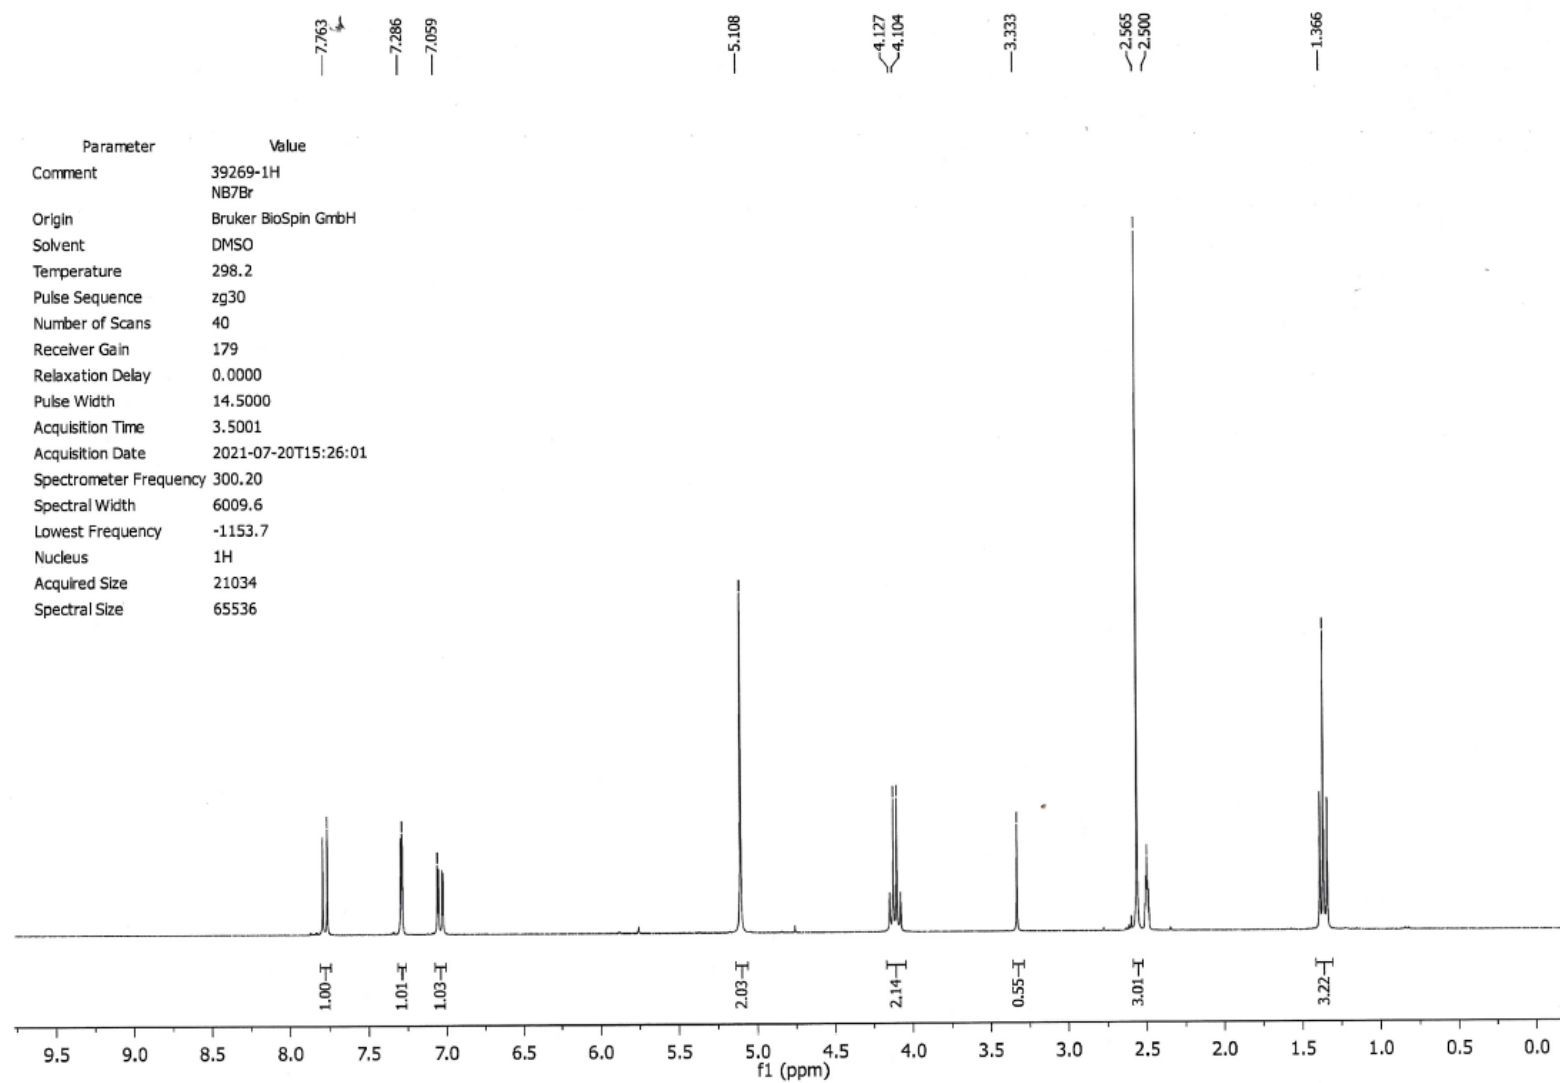

**Spectrum 10.**  $^{13}\text{C}$  NMR of compound **1** (75.5 MHz,  $\text{CDCl}_3$ ).

32661.2.fid  
32661-13C  
NR1

| Parameters |                        | Value               |
|------------|------------------------|---------------------|
| 1          | Owner                  | felix               |
| 2          | Solvent                | $\text{CDCl}_3$     |
| 3          | Temperature            | 298.2               |
| 4          | Pulse Sequence         | zgpg30              |
| 5          | Experiment             | 1D                  |
| 6          | Number of Scans        | 256                 |
| 7          | Receiver Gain          | 200.0               |
| 8          | Relaxation Delay       | 1.5000              |
| 9          | Pulse Width            | 10.0000             |
| 10         | Acquisition Time       | 1.7302              |
| 11         | Acquisition Date       | 2020-11-23T12:03:00 |
| 12         | Spectrometer Frequency | 75.49               |
| 13         | Spectral Width         | 18939.4             |
| 14         | Lowest Frequency       | -789.5              |
| 15         | Nucleus                | $^{13}\text{C}$     |
| 16         | Acquired Size          | 32768               |
| 17         | Spectral Size          | 32768               |

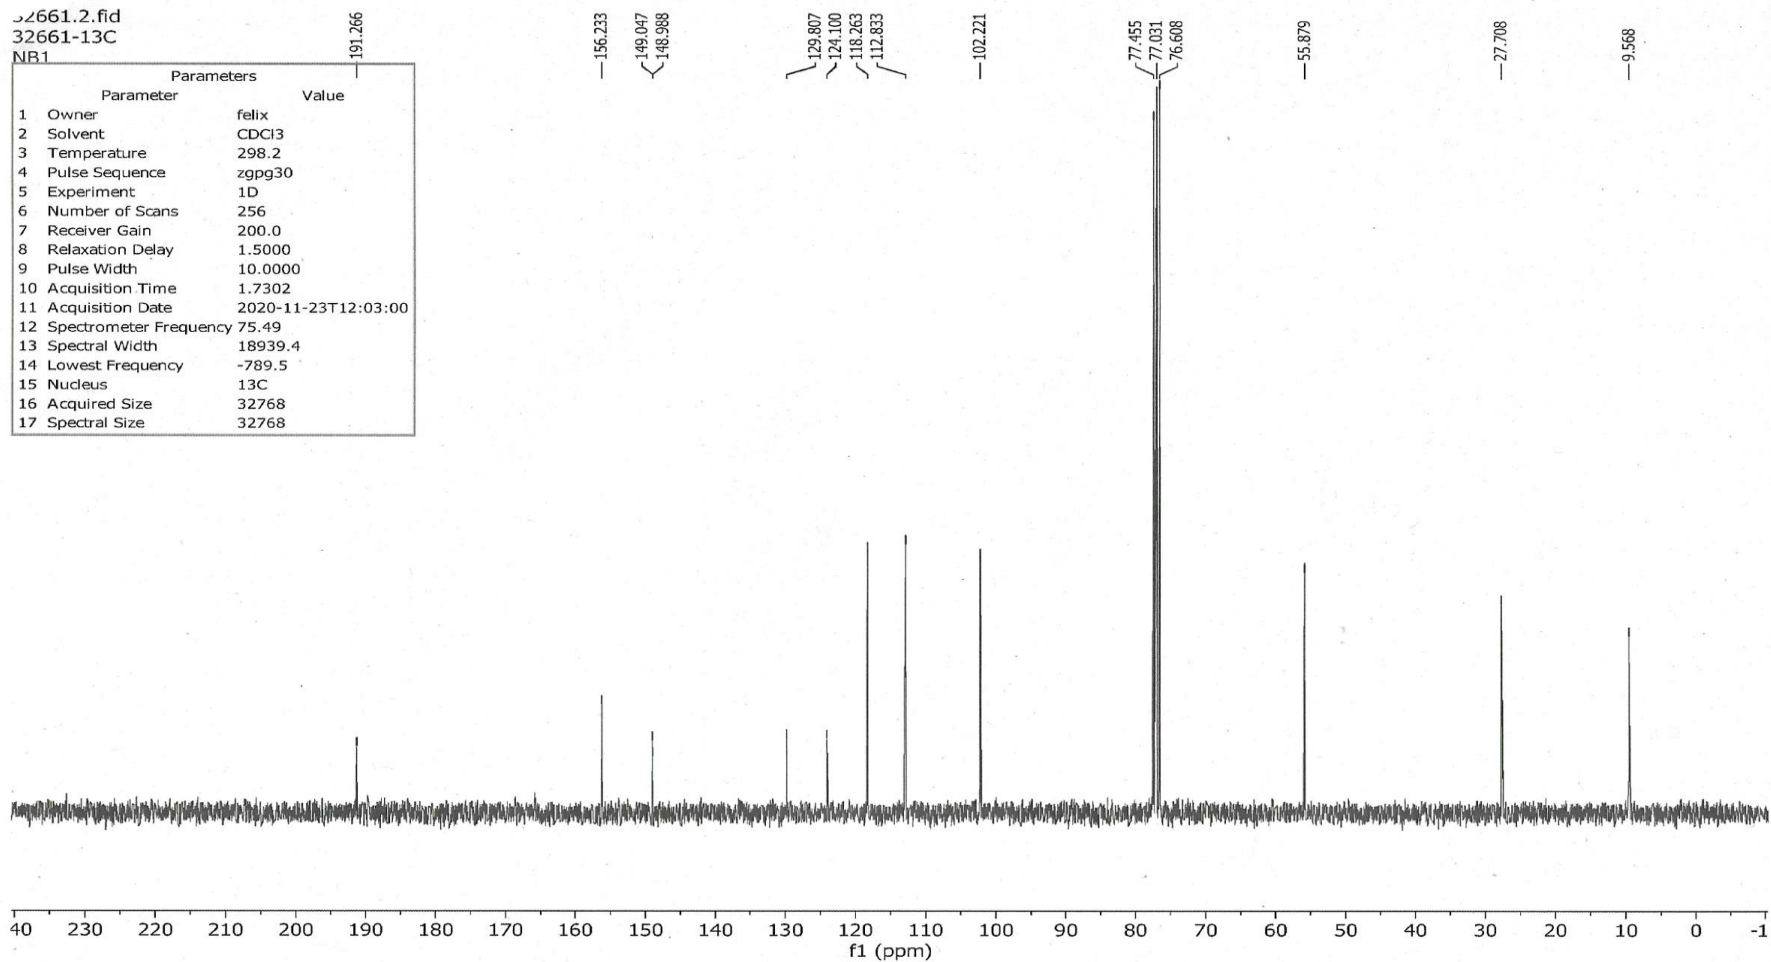

**Spectrum 11.**  $^{13}\text{C}$  NMR of compound **2** (75.5 MHz,  $\text{CDCl}_3$ )

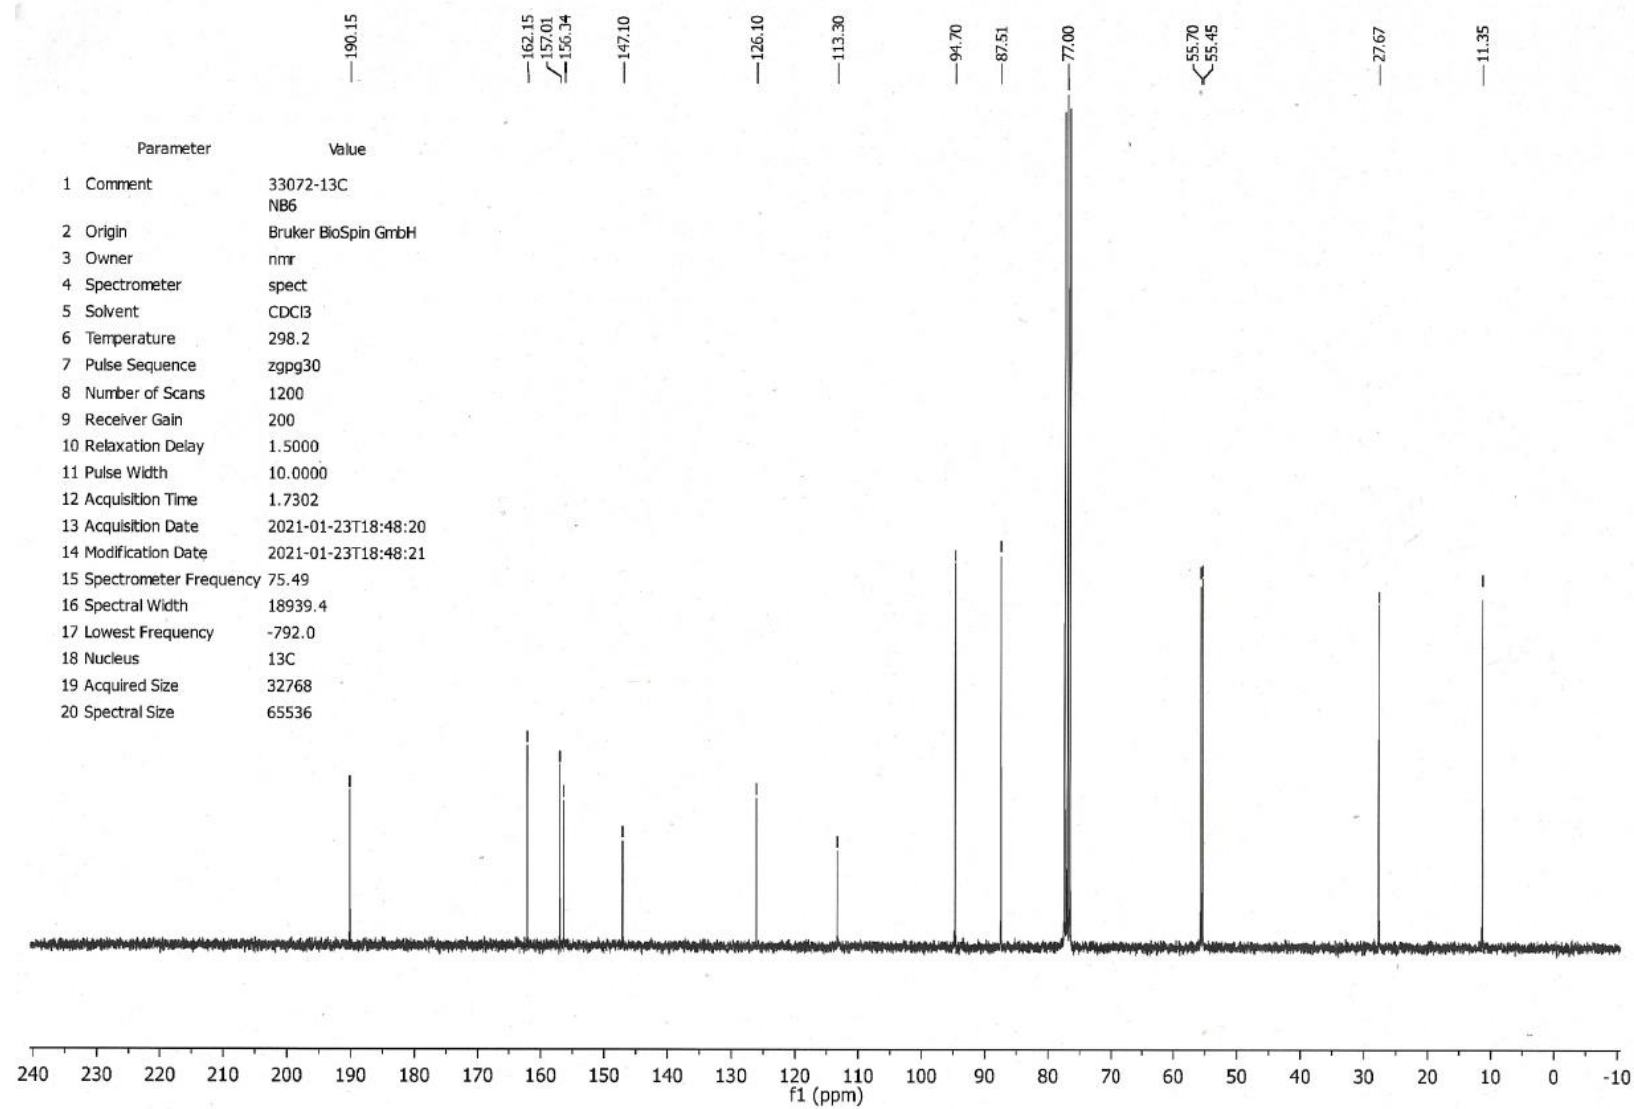

**Spectrum 12.**  $^{13}\text{C}$  NMR of compound **3** (75.5 MHz,  $\text{CDCl}_3$ )

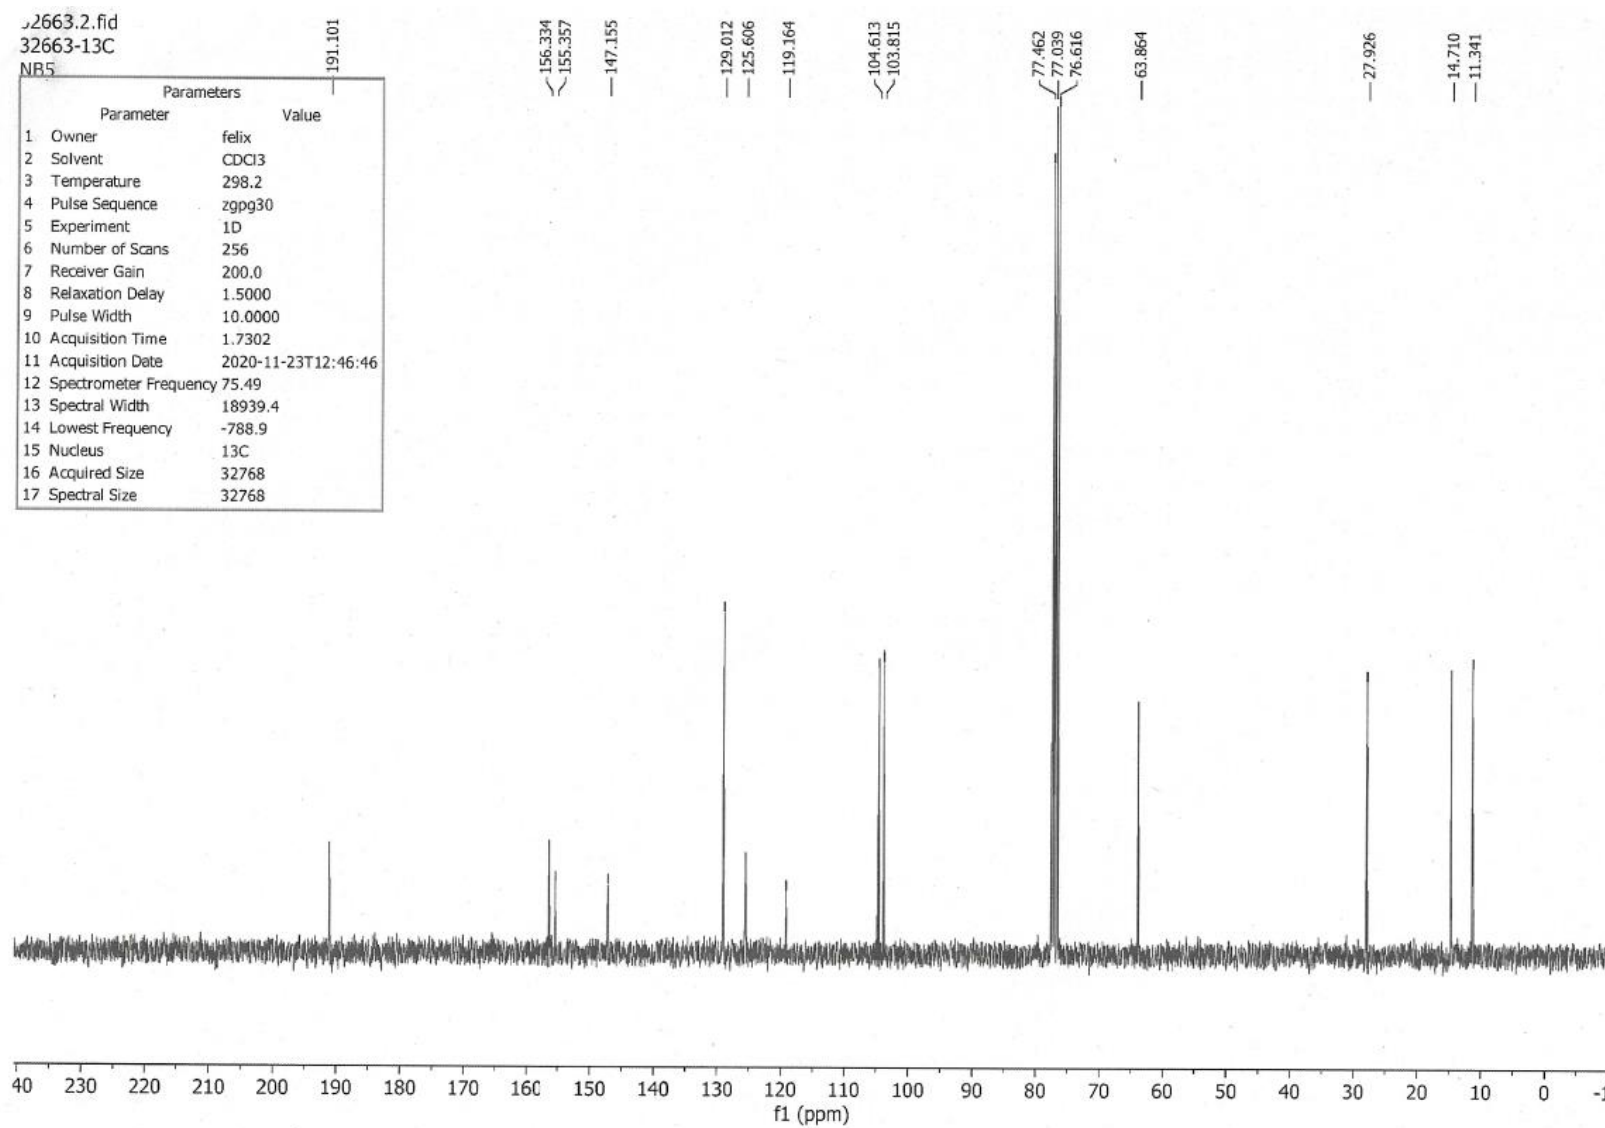

**Spectrum 13.**  $^{13}\text{C}$  NMR of compound **4** (75.5 MHz,  $\text{CDCl}_3$ )

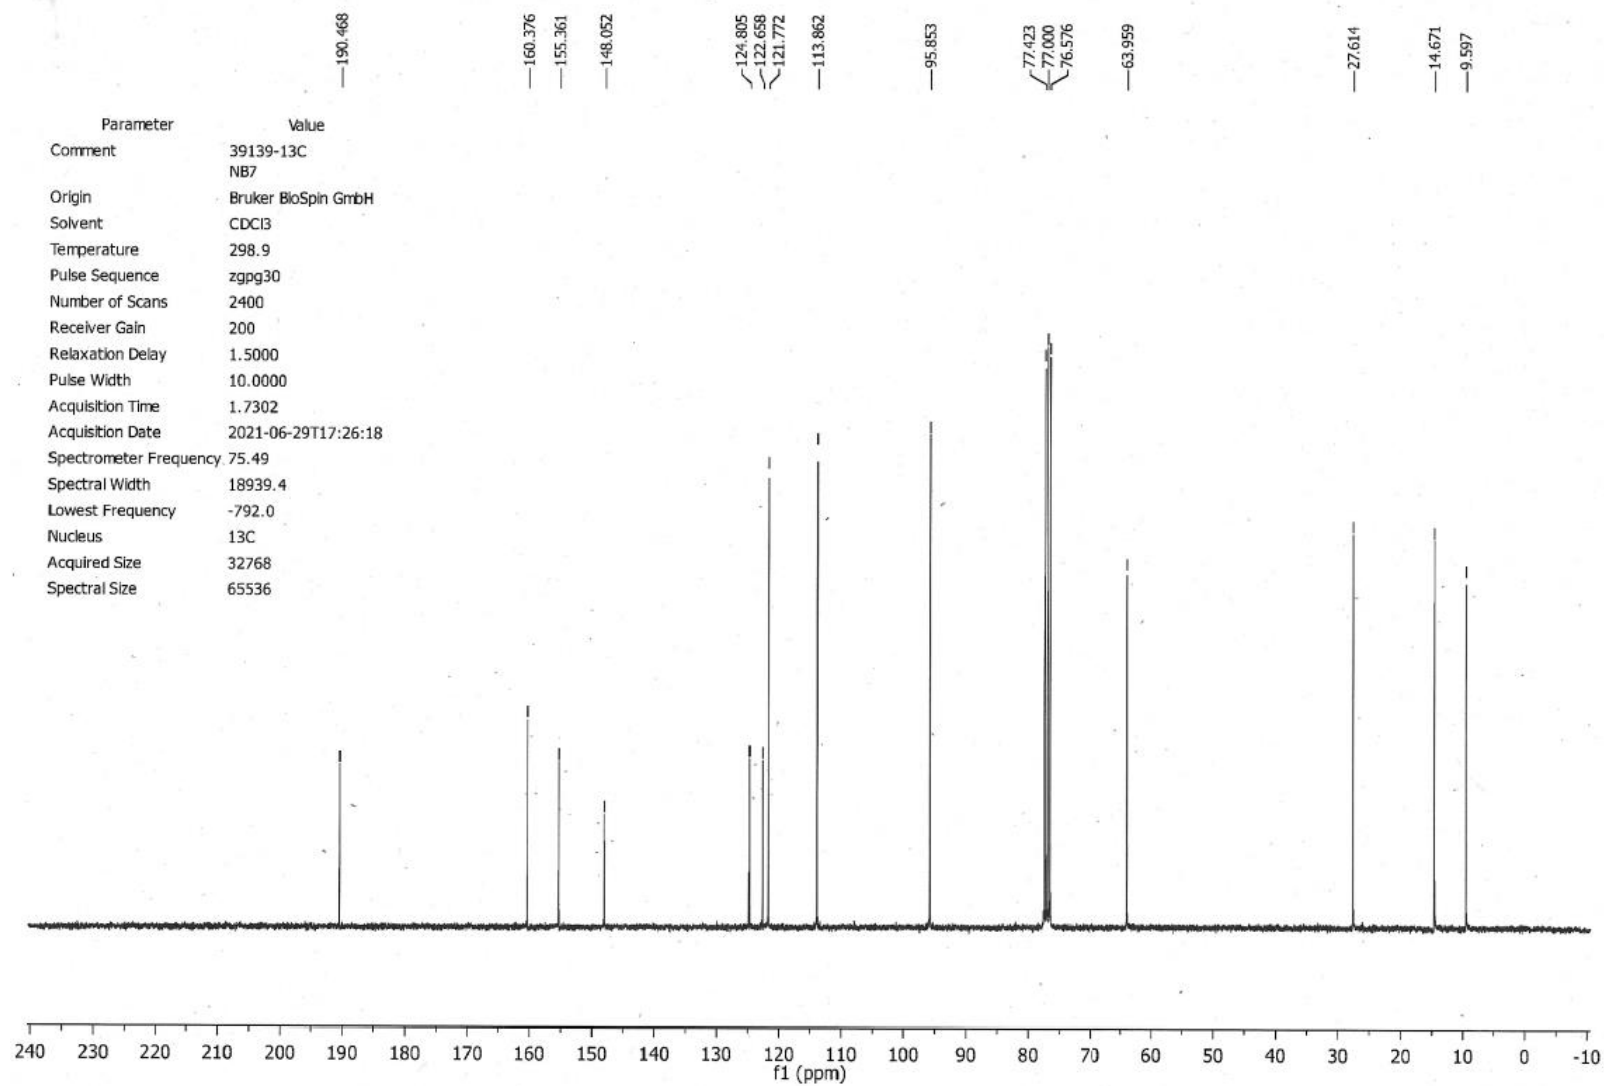

**Spectrum 14.**  $^{13}\text{C}$  NMR of compound **5** (75.5 MHz,  $\text{CDCl}_3$ )

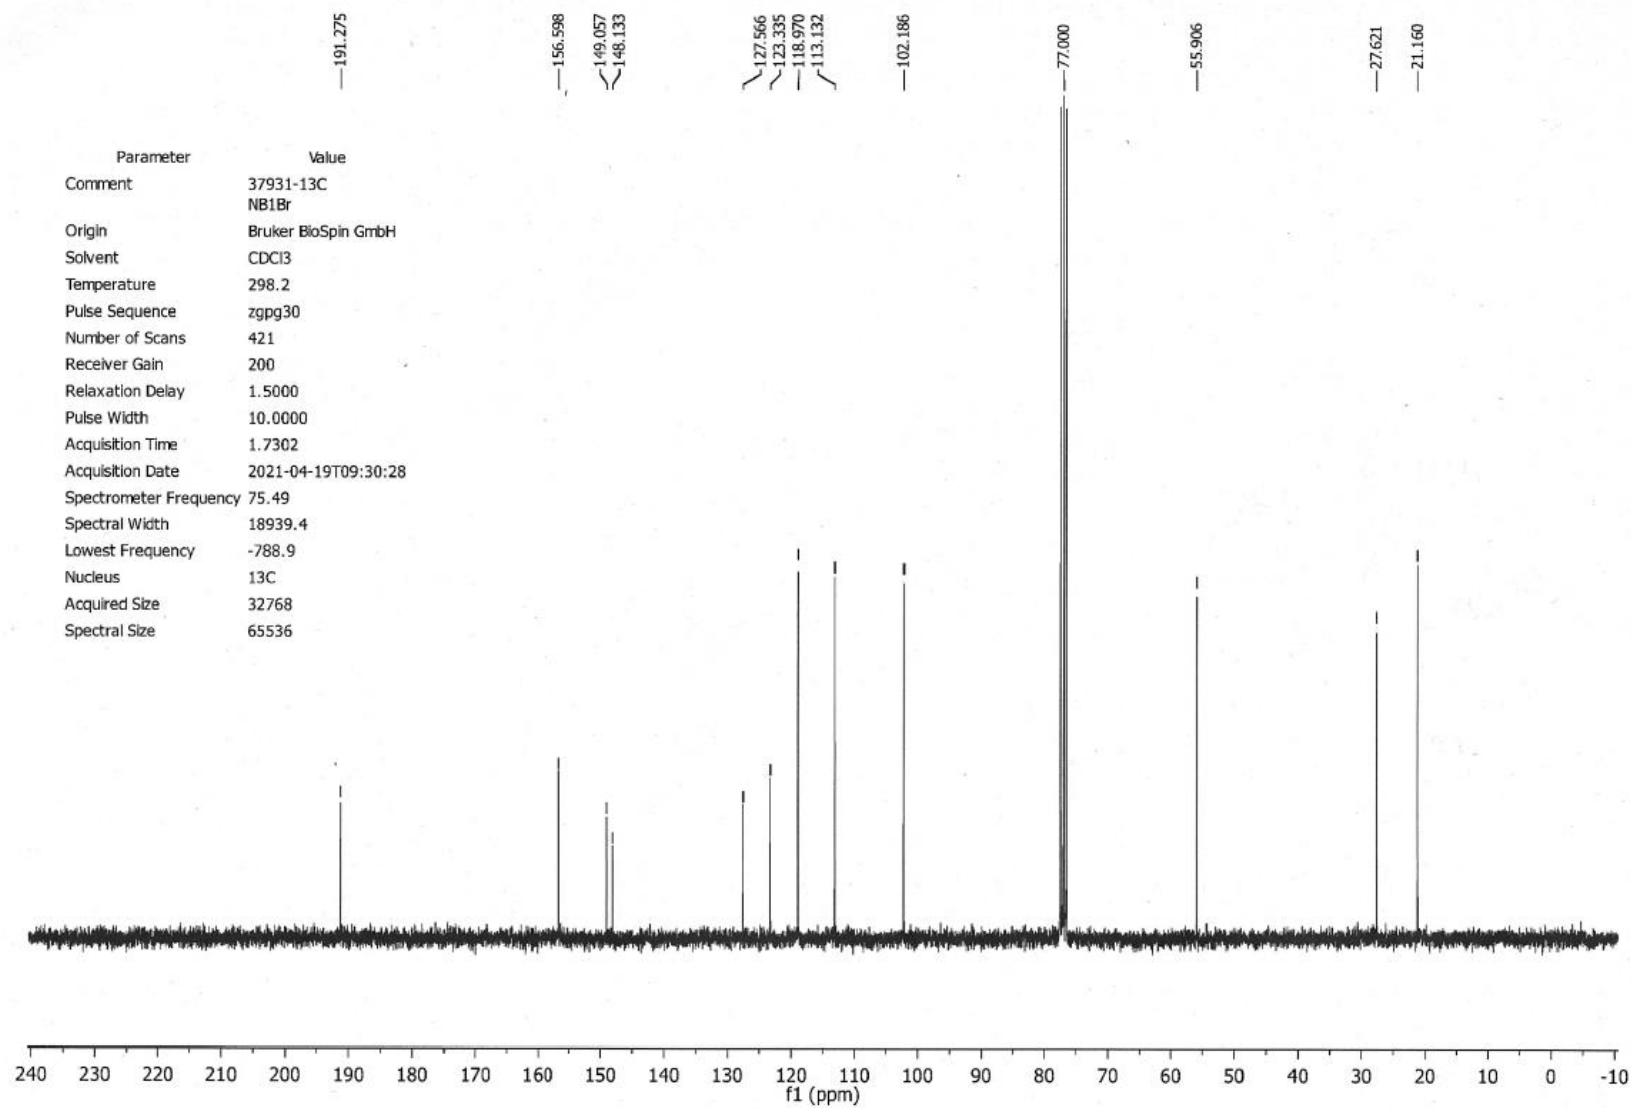

**Spectrum 15.**  $^{13}\text{C}$  NMR of compound **6** (75.5 MHz,  $\text{CDCl}_3$ )

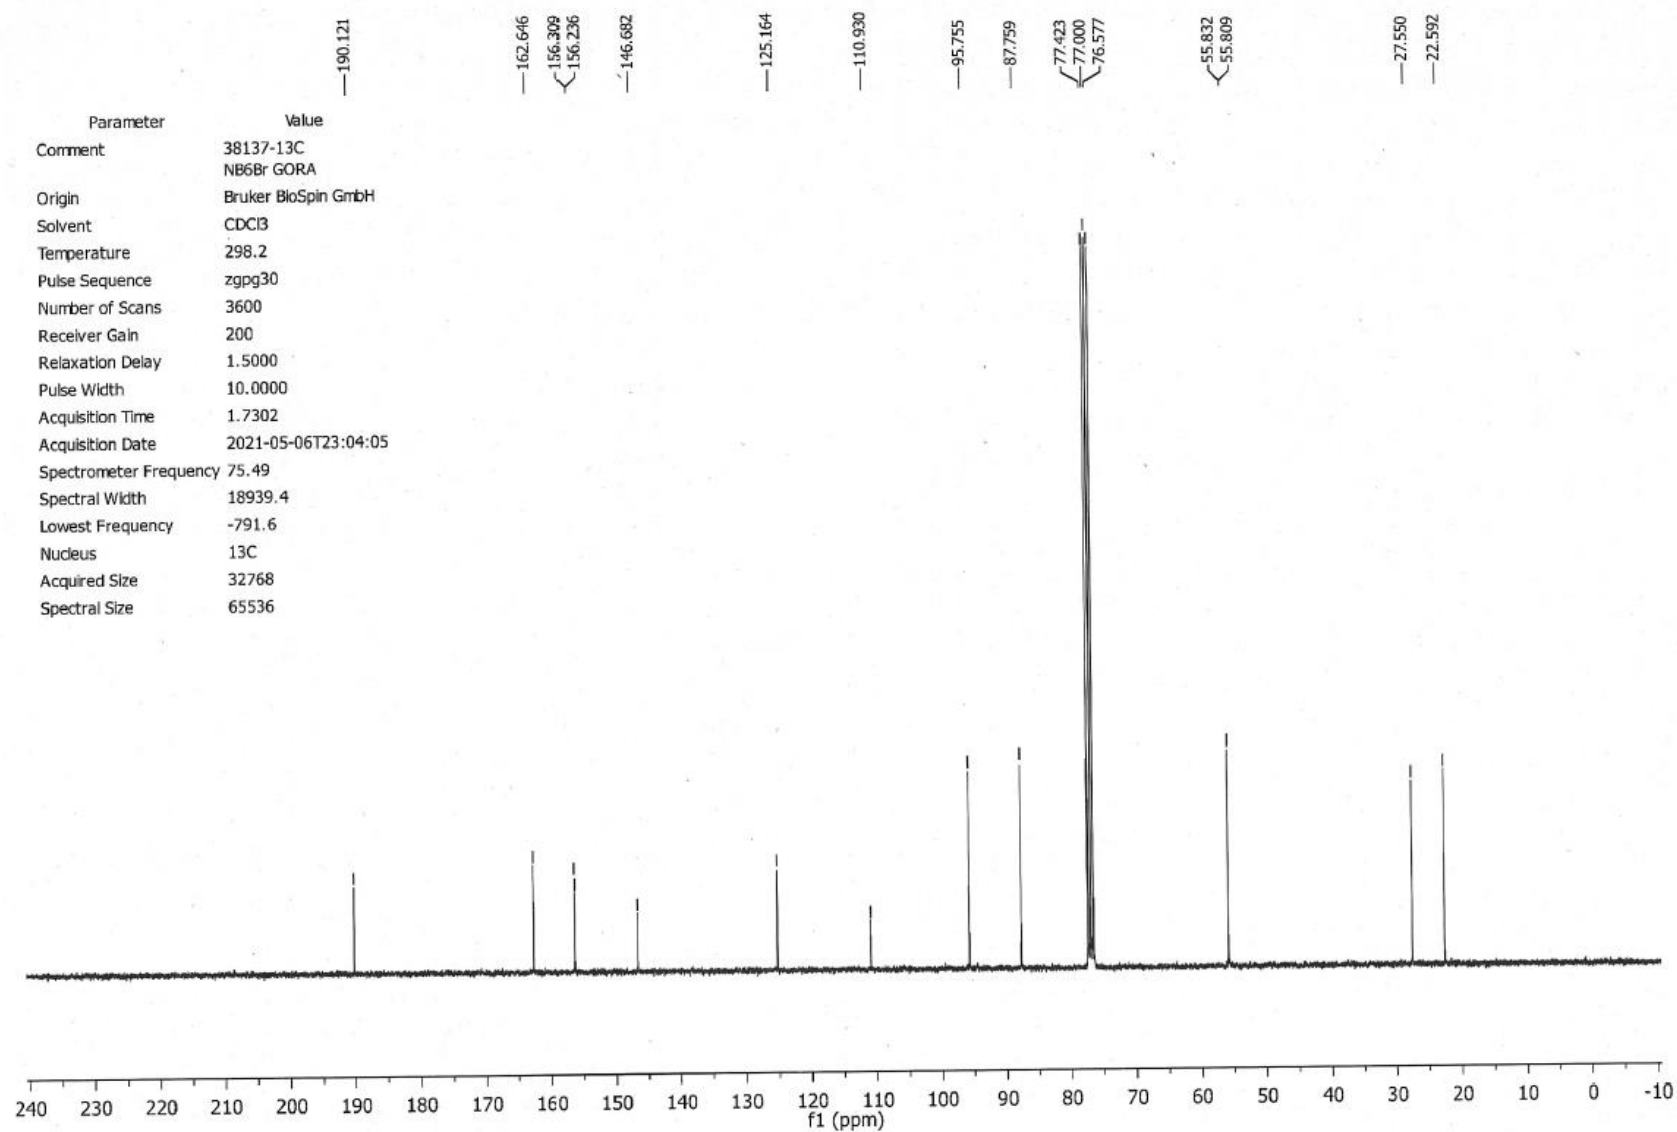



**Spectrum 16.**  $^{13}\text{C}$  NMR of compound **7** (75.5 MHz,  $\text{CDCl}_3$ )

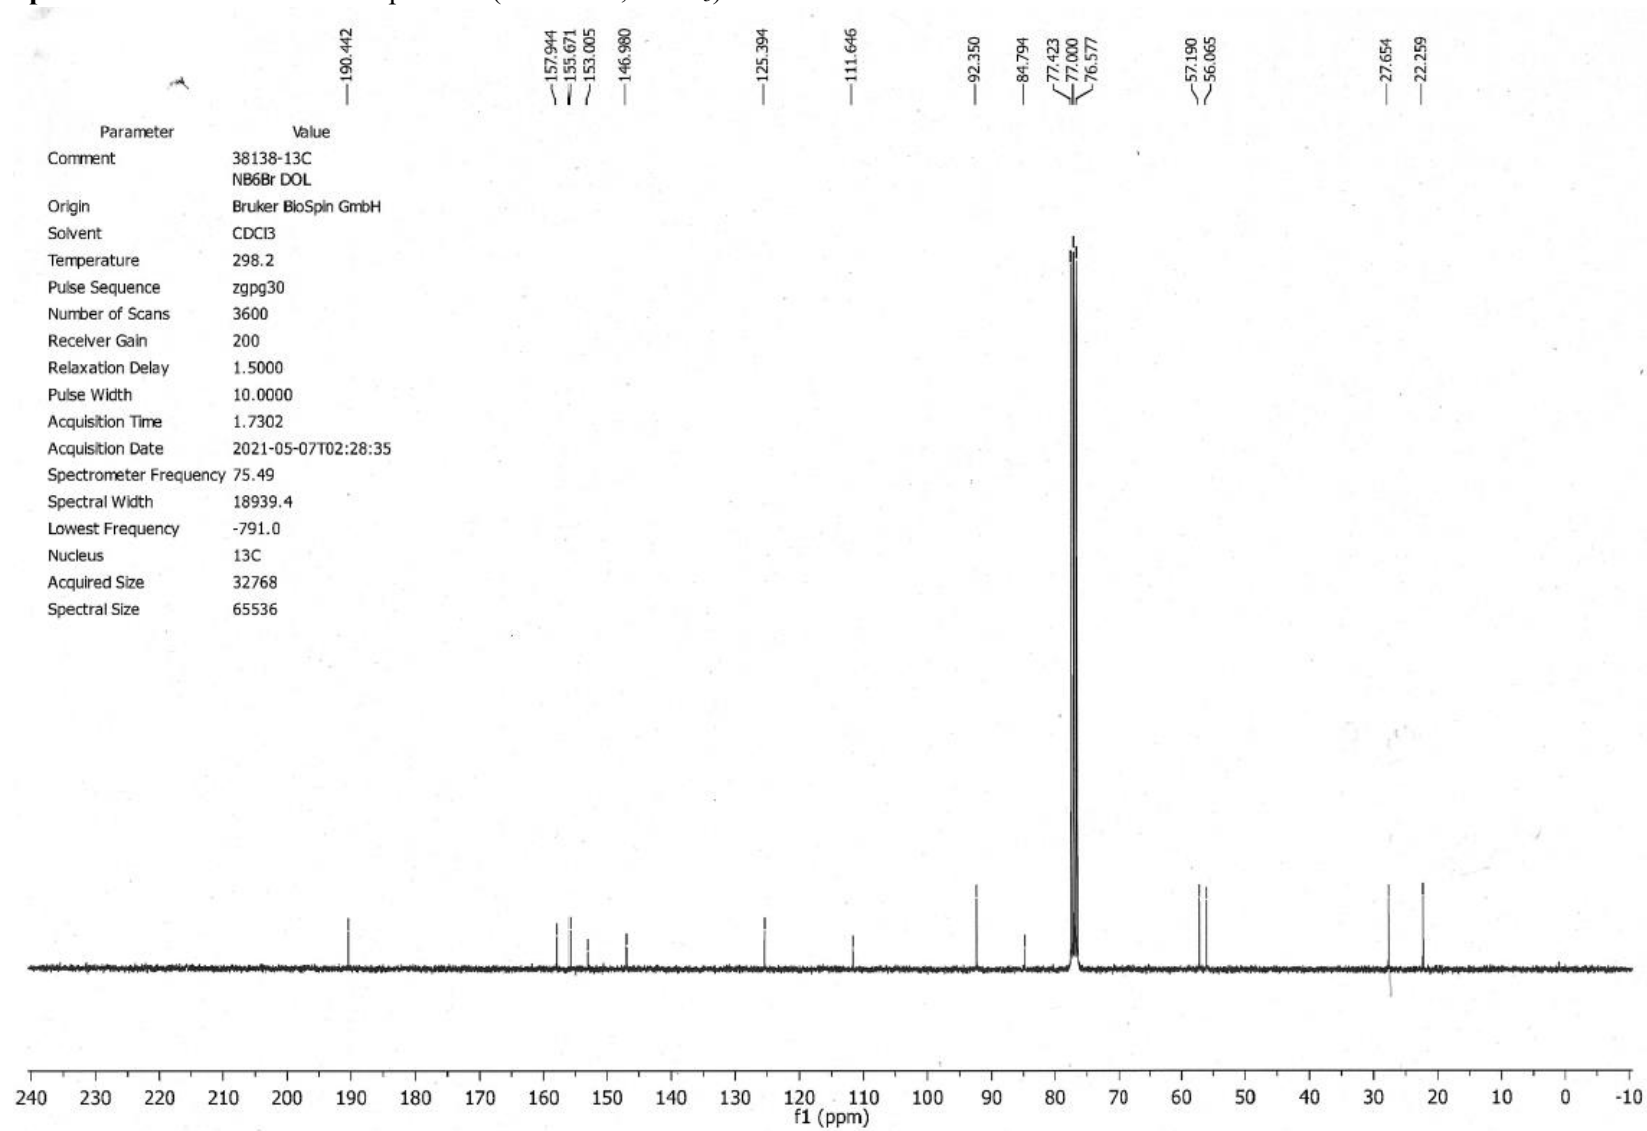

**Spectrum 17.**  $^{13}\text{C}$  NMR of compound **8** (75.5 MHz,  $\text{CDCl}_3$ )

32665.2.fid  
32665-13C  
NB5Br

| Parameters                |                     |       |
|---------------------------|---------------------|-------|
| Parameter                 |                     | Value |
| 1 Owner                   | felix               |       |
| 2 Solvent                 | $\text{CDCl}_3$     |       |
| 3 Temperature             | 298.2               |       |
| 4 Pulse Sequence          | zgpg30              |       |
| 5 Experiment              | 1D                  |       |
| 6 Number of Scans         | 256                 |       |
| 7 Receiver Gain           | 200.0               |       |
| 8 Relaxation Delay        | 1.5000              |       |
| 9 Pulse Width             | 10.0000             |       |
| 10 Acquisition Time       | 1.7302              |       |
| 11 Acquisition Date       | 2020-11-23T13:19:54 |       |
| 12 Spectrometer Frequency | 75.49               |       |
| 13 Spectral Width         | 18939.4             |       |
| 14 Lowest Frequency       | -788.9              |       |
| 15 Nucleus                | $^{13}\text{C}$     |       |
| 16 Acquired Size          | 32768               |       |
| 17 Spectral Size          | 32768               |       |

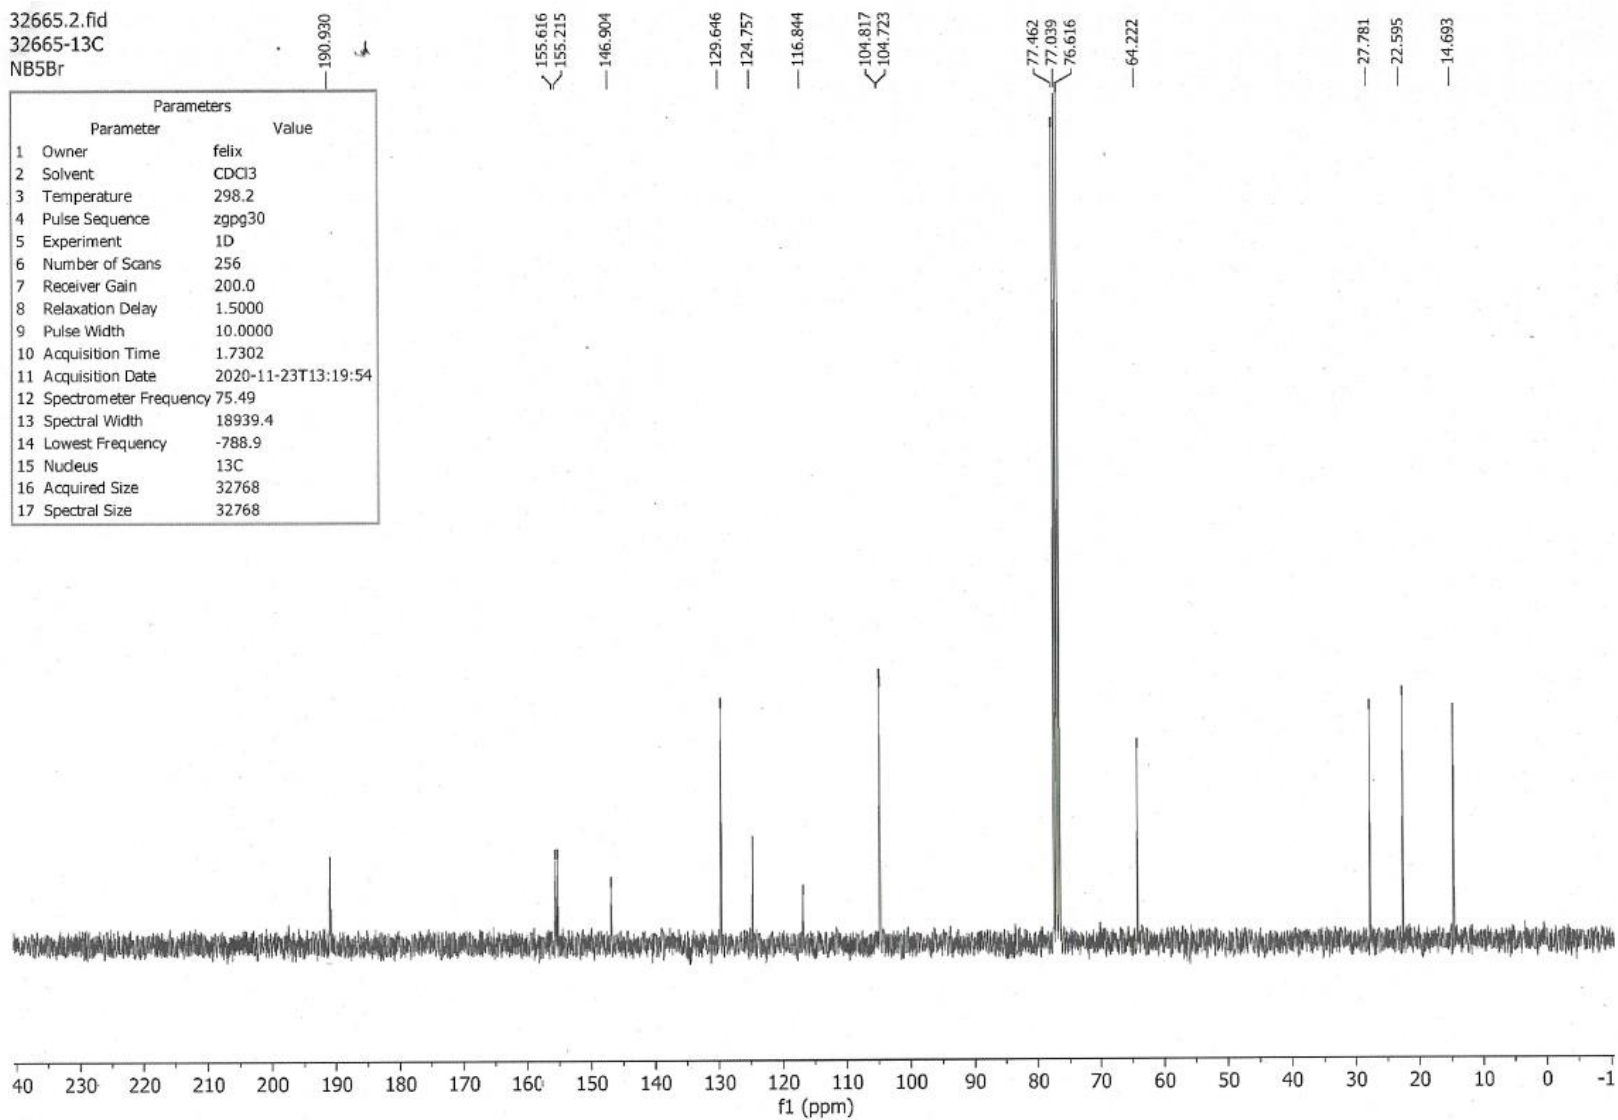

**Spectrum 18.**  $^{13}\text{C}$  NMR of compound **9** (75.5 MHz,  $\text{CDCl}_3$ )

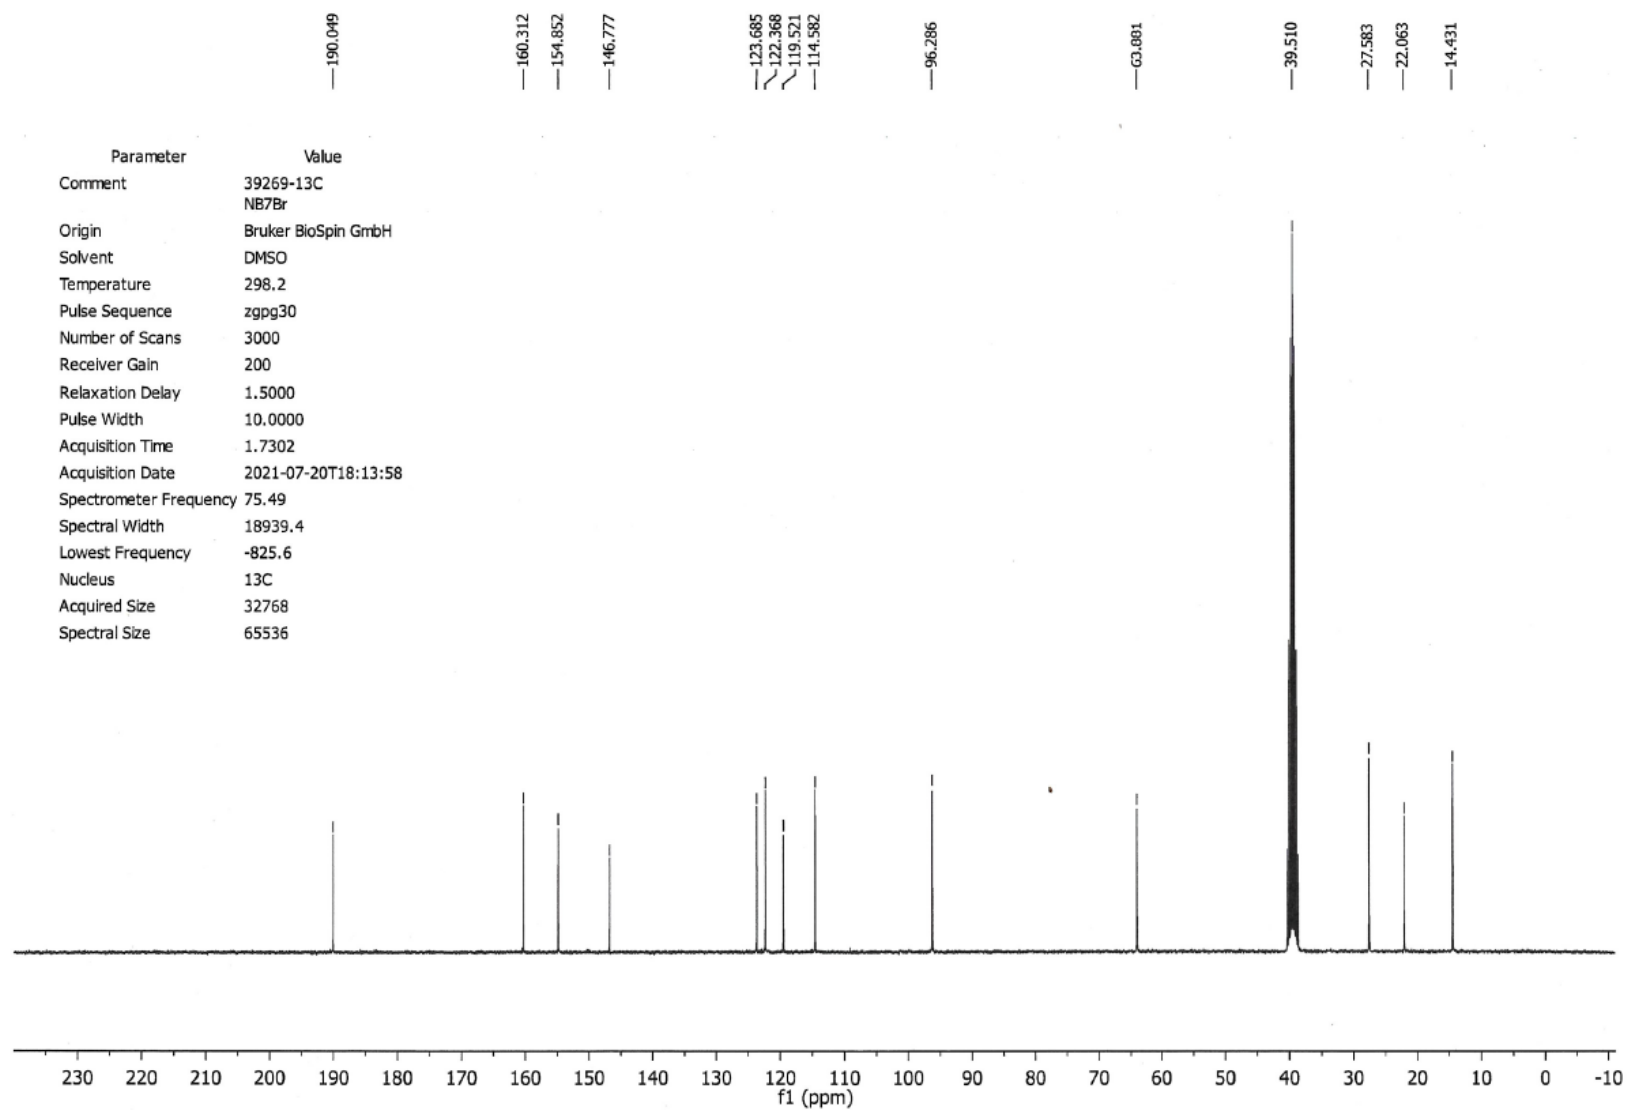

Supplement: s1 [file s1]
